# Supplementary material for: Carbon Sequestration in Carob (Ceratonia siliqua L.) Plantations under the EU Afforestation Program in Southern Spain Using Low-Density Aerial Laser Scanning (ALS) Data
Source: MDPI journal article supplement (doi:10.3390/f13020285), 2022-02-10
Supplement: s1 [file s1]

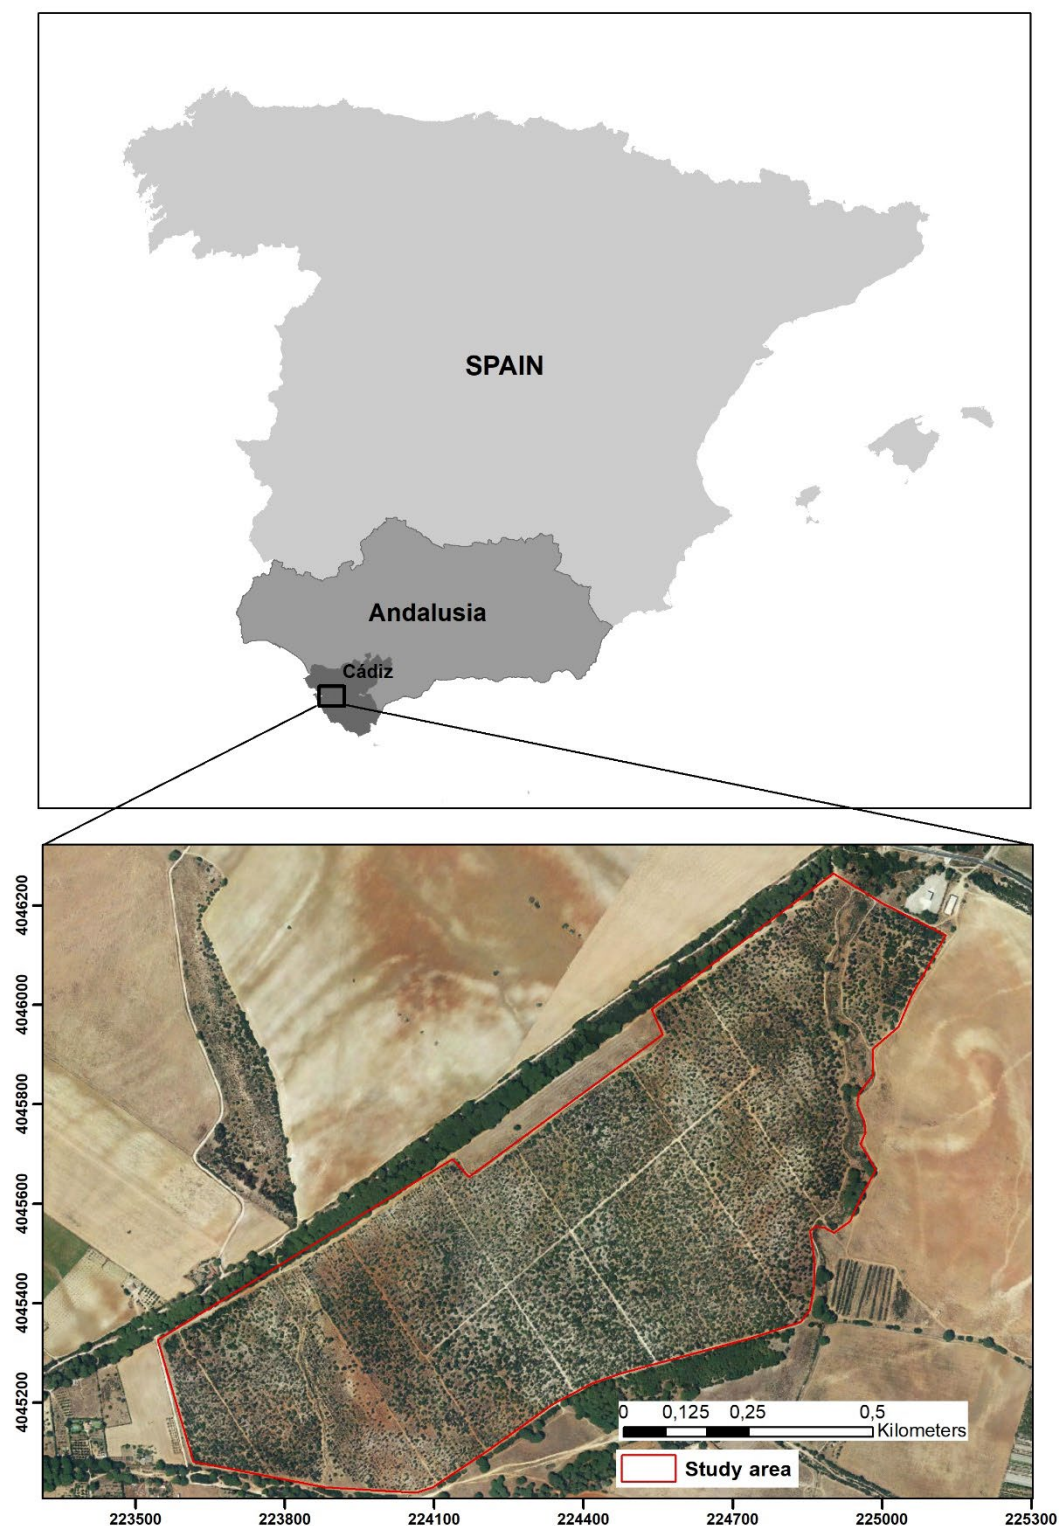

**Figure S1.** Location of the study area and afforestation perimeter.

**Table S1.** Dasometric characteristics (H: height, bd: base diameter, dbh: diameter at breast height, G: basal area); Mean (standard error), and biomass measures of Carob trees plots (n = 9).

| H (m)                                    | bd (cm)                                   | dbh (cm)                               | G (m <sup>2</sup> ha <sup>-1</sup> )   | Density (trees/ha)    |
|------------------------------------------|-------------------------------------------|----------------------------------------|----------------------------------------|-----------------------|
| 3,86 (0,14)                              | 12,95 (0,76)                              | 9,32 (0,58)                            | 2,31 (0,27)                            | 179 (12)              |
| Foliate Biomass (kg tree <sup>-1</sup> ) | Branches Biomass (kg tree <sup>-1</sup> ) | Stems Biomass (kg tree <sup>-1</sup> ) | Roots Biomass (kg tree <sup>-1</sup> ) | Biomass per tree (kg) |
| 6,82 (0,85)                              | 14,53 (3,06)                              | 9,53 (1,04)                            | 17,07 (2,42)                           | 46,48 (6,62)          |

**Table S2.** ALS-based metrics used for the estimation of tree heights. All the metrics were obtained with FUSION from normalized LAS files.

| ALS-based metrics derived      | Description                                                                                        |
|--------------------------------|----------------------------------------------------------------------------------------------------|
| <i>H_Min</i>                   | Minimum                                                                                            |
| <i>H_Max</i>                   | Maximum                                                                                            |
| <i>H_Mean</i>                  | Mean                                                                                               |
| <i>H_Mode</i>                  | Mode                                                                                               |
| <i>H_StdDev</i>                | Standard deviation                                                                                 |
| <i>H_Var</i>                   | Variance                                                                                           |
| <i>H_CV</i>                    | Coefficient of variation                                                                           |
| <i>H_IQ</i>                    | Interquartile distance                                                                             |
| <i>H_Skew</i>                  | Skewness                                                                                           |
| <i>H_Kurt</i>                  | Krutosis                                                                                           |
| <i>H_AAD</i>                   | Average Absolute Deviation                                                                         |
| <i>H_MADMedian</i>             | Median of the absolute deviations from the overall median                                          |
| <i>H_MADMode</i>               | Median of the absolute deviations from the overall mode                                            |
| <i>H_L1, H_L2, ... ,H_L4</i>   | L_moments L1, L2, ... ,L4                                                                          |
| <i>H_LSkew</i>                 | L_moment of skewness                                                                               |
| <i>H_LKurt</i>                 | L_moment of kurtosis                                                                               |
| <i>H_P01, H_P10,..., H_P99</i> | Percentile values (1 <sup>st</sup> , 5 <sup>th</sup> , 10 <sup>th</sup> , ... , 99 <sup>th</sup> ) |
